# Supplementary material for: Identification of UBA7 expression downregulation in myelodysplastic neoplasm with SF3B1 mutations
Source: Springer Nature journal article supplement (doi:10.1038/s41598-025-95738-9), 2025-03-29
Supplement: MOESM2 [file 41598_2025_95738_MOESM2_ESM.pdf]

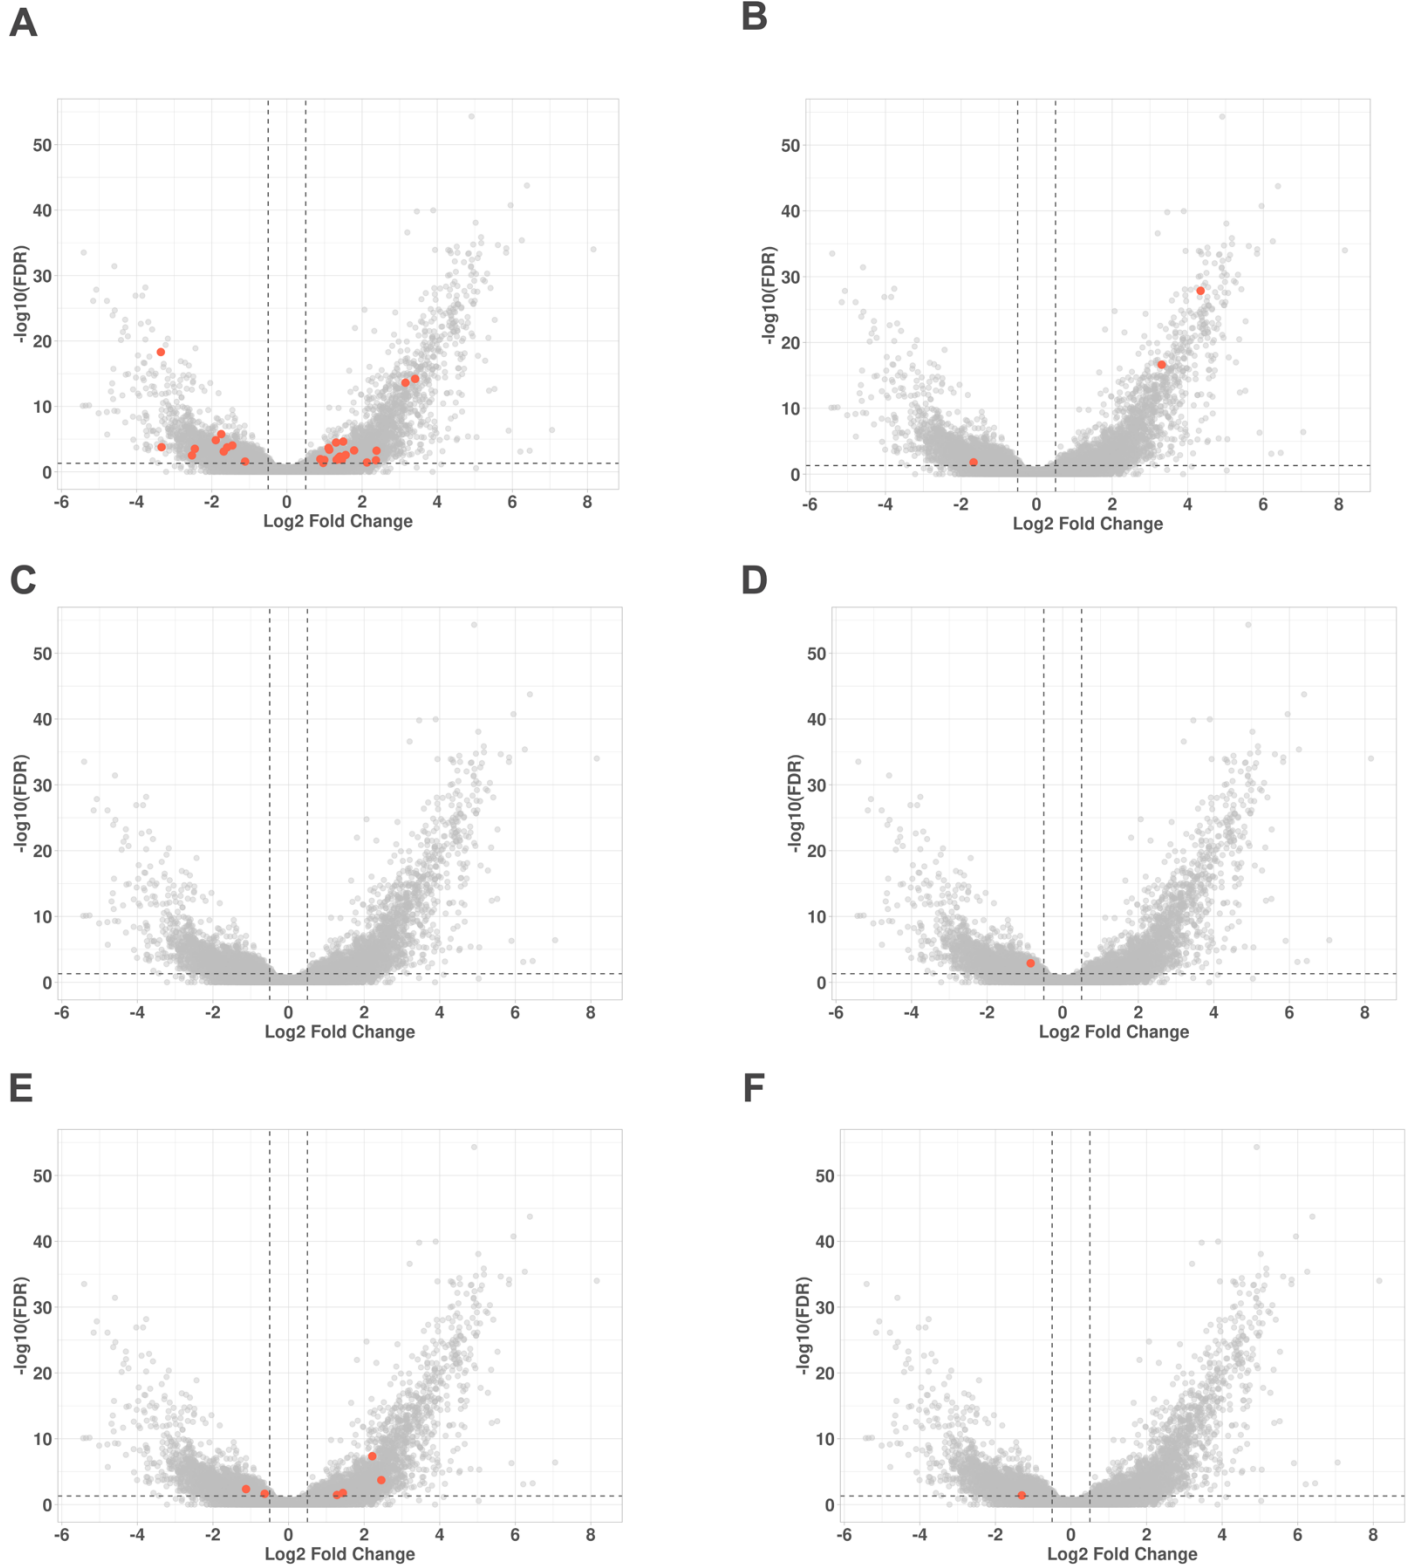

### Supplement 5: Differential Splicing Events in Genes of Interest in MDS with *SF3B1* Mutation versus Wild-Type *SF3B1*.

Volcano plots depict splicing events identified when contrasting MDS with *SF3B1* mutation against MDS with wild-type *SF3B1*. Each point represents a splicing event, with red points indicating events with an FDR below 0.05. (A) *UBA7*, (B) *BRD9*, (C) *PPP2R5A*, (D) *SRSF2*, (E) *U2AF1*, and (F) *ZRSR2*. The x-axis shows the log2 fold change, and the y-axis indicates the  $-\log_{10}(\text{FDR})$ .

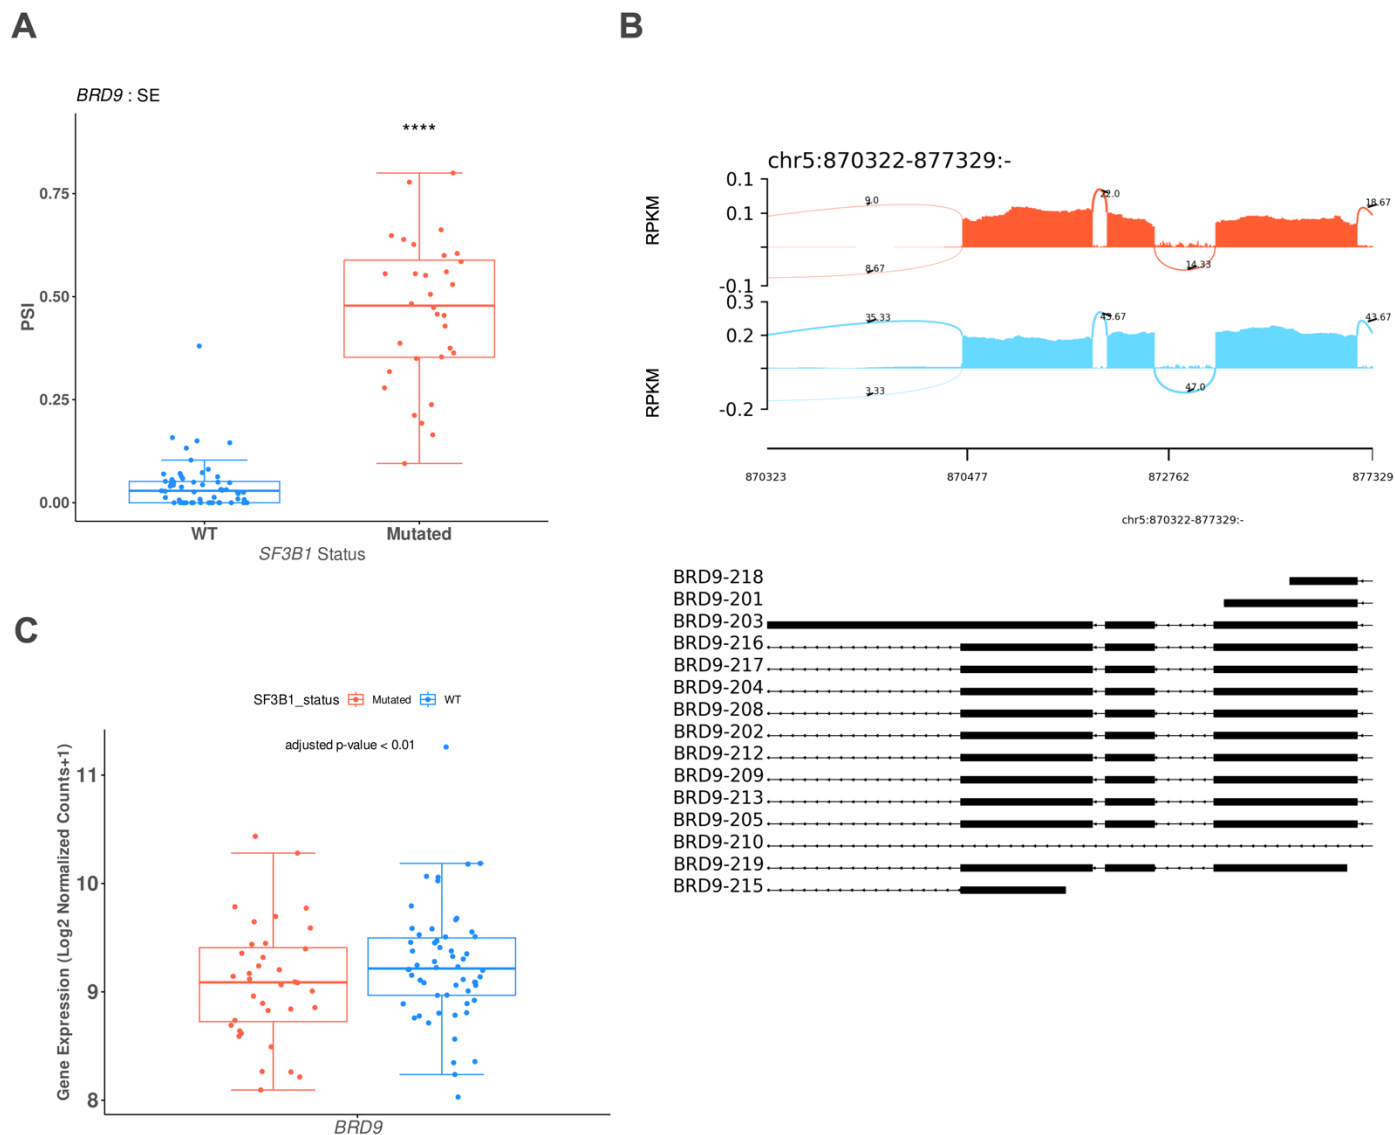

## Supplement 6: Evaluation of splicing and expression changes in the *BRD9* gene across *SF3B1*-mutant and wild-type samples

(A) Boxplots showing the Percent-Spliced-In (PSI) values for selected splicing event skipped exon (SE) for *BRD9* between wild-type (WT, blue) and *SF3B1*-mutant (red) MDS samples. (\*\*\*\*FDR < 0.0001, \*\*\*FDR < 0.001, \*\*FDR < 0.01, \*FDR < 0.05). (B) Sashimi plots comparing RNA-seq read coverage and splicing patterns of *BRD9* between WT (blue) and *SF3B1*-mutant (red) samples. Numbers on curved lines represent the average junction-spanning read counts for each group, normalized using RPKM. The genomic localization of splicing events is displayed below the plots, showing exon-intron structures and splice junctions for each gene. The sashimi plot does not appear to exhibit dramatic changes in junction-spanning read counts or splicing patterns between *SF3B1*-mutant and WT samples, unlike *UBA7*, where such differences were more evident. (C) Boxplots illustrating the log2- normalized expression levels of *BRD9* between WT (blue) and *SF3B1*-mutant (red) samples.

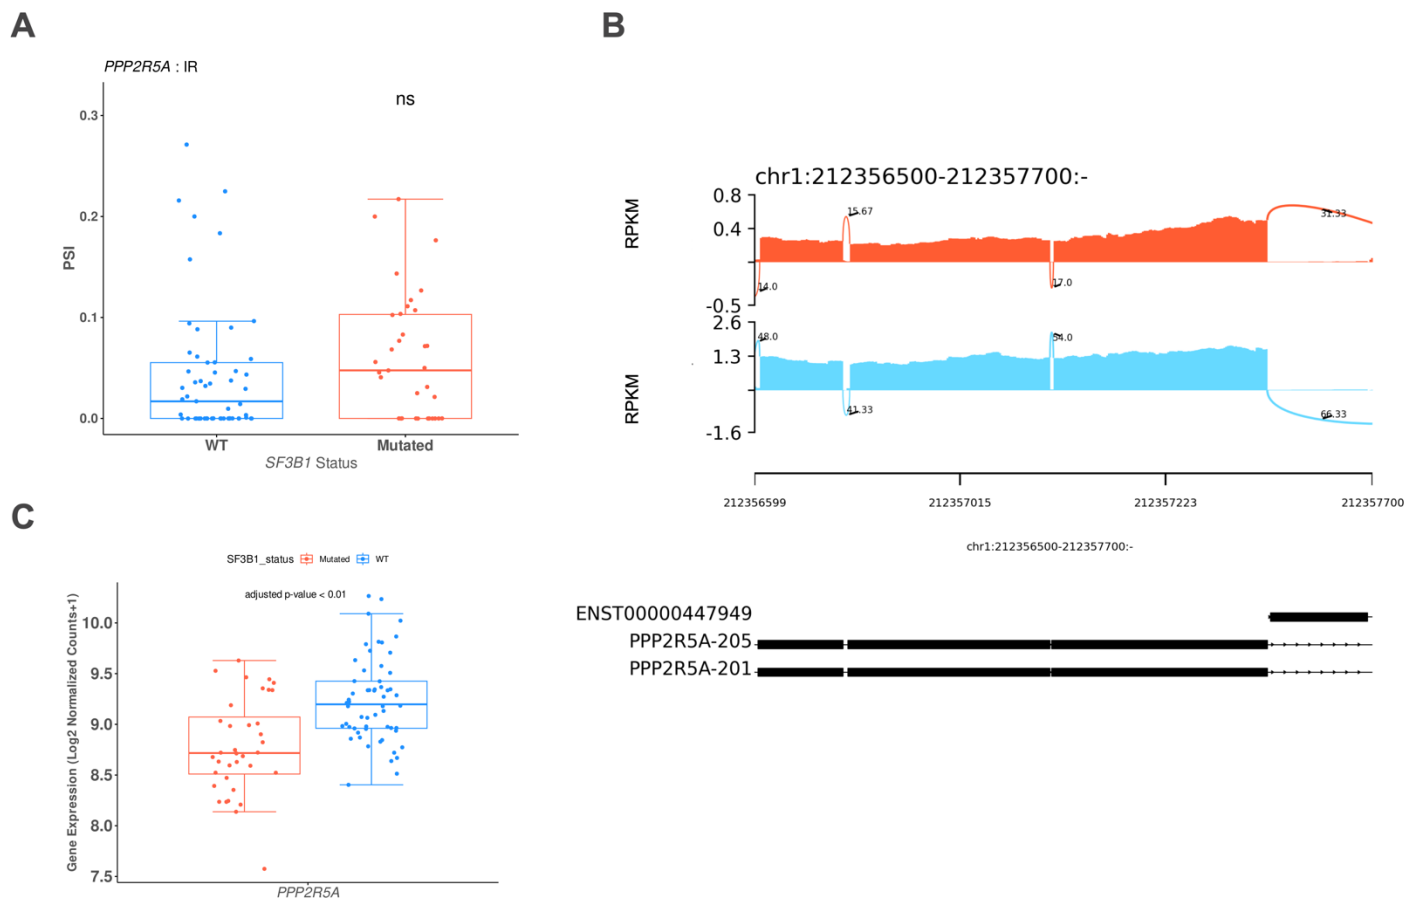

## Supplement 7: Evaluation of splicing and expression changes in *PPP2R5A* gene across *SF3B1*-mutant and wild-type samples

(A) Boxplots showing the Percent-Spliced-In (PSI) values for selected splicing event intron retention (IR) for *PPP2R5A* between wild-type (WT, blue) and *SF3B1*-mutant (red) MDS samples. (\*\*\*\*FDR < 0.0001, \*\*\*FDR < 0.001, \*\*FDR < 0.01, \*FDR < 0.05). (B) Sashimi plots comparing RNA-seq read coverage and splicing patterns of *PPP2R5A* between WT (blue) and *SF3B1*-mutant (red) samples. Numbers on curved lines represent the average junction-spanning read counts for each group, normalized using RPKM. The genomic localization of splicing events is displayed below the plots, showing exon-intron structures and splice junctions for each gene. The sashimi plot does not appear to exhibit dramatic changes in junction-spanning read counts or splicing patterns between *SF3B1*-mutant and WT samples, unlike *UBA7*, where such differences were more evident. (C) Boxplots illustrating the log2- normalized expression levels of *PPP2R5A* between WT (blue) and *SF3B1*-mutant (red) samples. *PPP2R5A* shows significantly low expression levels (adjusted p-value < 0.01).

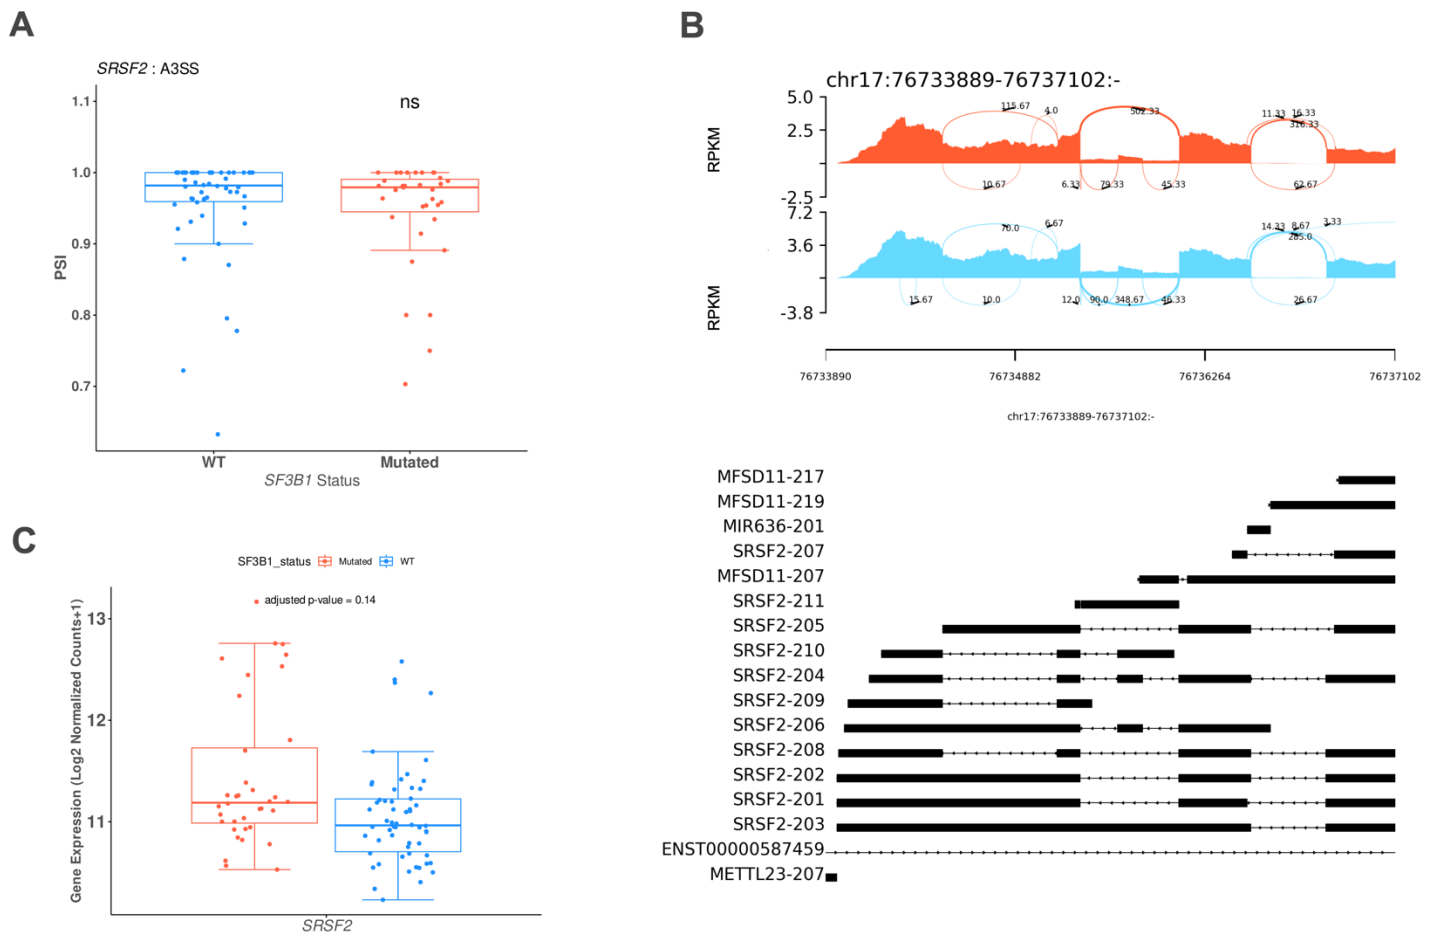

## Supplement 8: Evaluation of splicing and expression changes in the *SRSF2* gene across *SF3B1*-mutant and wild-type samples

(A) Boxplots showing the Percent-Spliced-In (PSI) values for selected splicing event alternative 3' splice site (A3SS) for *SRSF2* between wild-type (WT, blue) and *SF3B1*-mutant (red) MDS samples. (\*\*\*\*FDR < 0.0001, \*\*\*FDR < 0.001, \*\*FDR < 0.01, \*FDR < 0.05). (B) Sashimi plots comparing RNA-seq read coverage and splicing patterns of *SRSF2* between WT (blue) and *SF3B1*-mutant (red) samples. Numbers on curved lines represent the average junction-spanning read counts for each group, normalized using RPKM. The genomic localization of splicing events is displayed below the plots, showing exon-intron structures and splice junctions for each gene. The sashimi plot does not appear to exhibit dramatic changes in junction-spanning read counts or splicing patterns between *SF3B1*-mutant and WT samples, unlike *UBA7*, where such differences were more evident. (C) Boxplots illustrating the log<sub>2</sub>-normalized expression levels of *SRSF2* between WT (blue) and *SF3B1*-mutant (red) samples. *SRSF2* shows no significantly deregulated expression levels (adjusted p-value > 0.05).

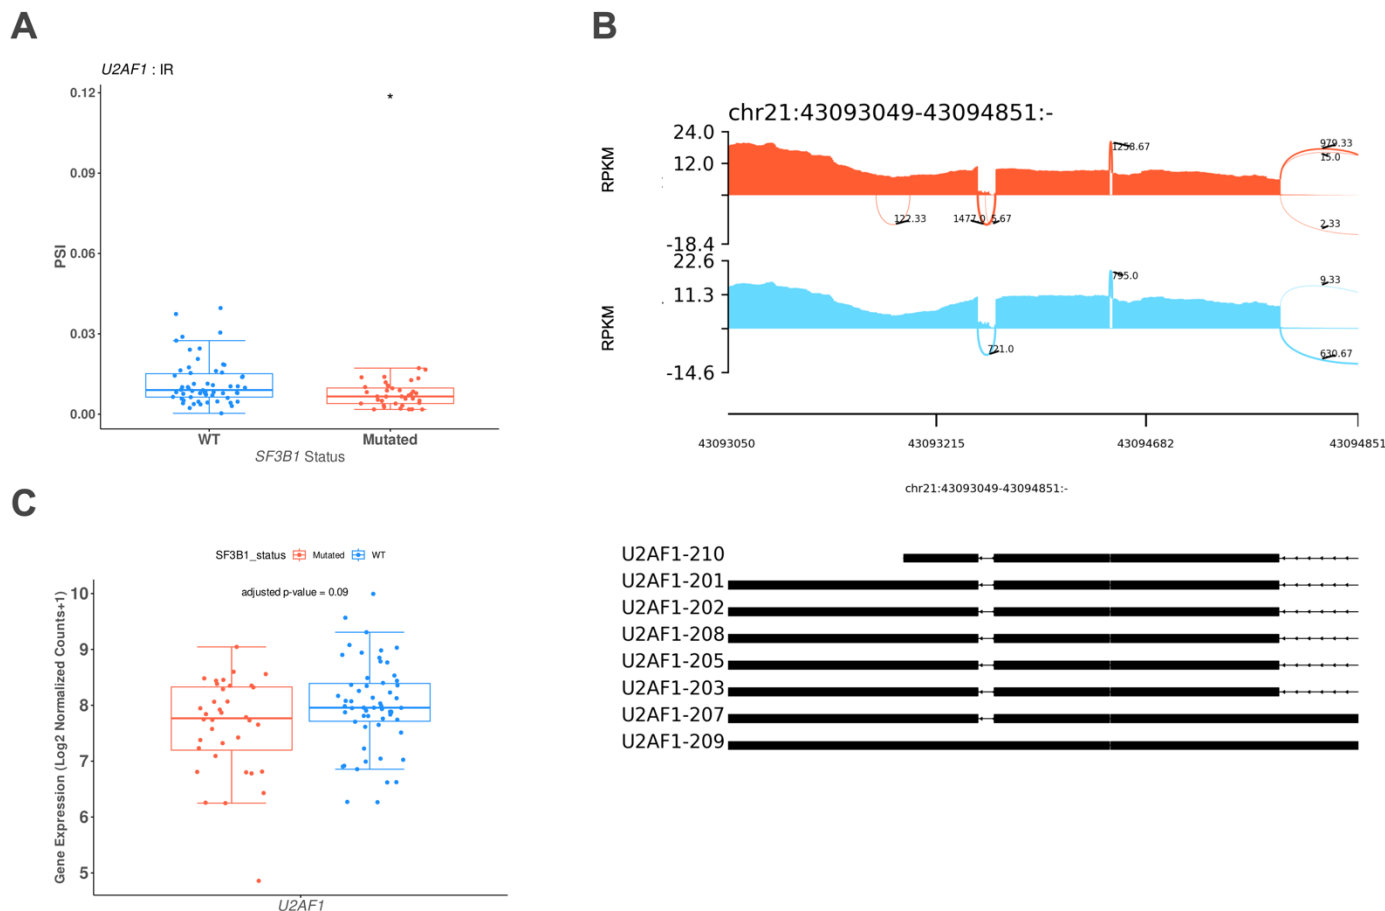

## Supplement 9: Evaluation of splicing and expression changes in *U2AF1* gene across *SF3B1*-mutant and wild-type samples

(A) Boxplots showing the Percent-Spliced-In (PSI) values for selected splicing event intron retention (IR) event in *U2AF1* between wild-type (WT, blue) and *SF3B1*-mutant (red) MDS samples. (\*\*\*\*FDR < 0.0001, \*\*\*FDR < 0.001, \*\*FDR < 0.01, \*FDR < 0.05). (B) Sashimi plots comparing RNA-seq read coverage and splicing patterns of *U2AF1* between WT (blue) and *SF3B1*-mutant (red) samples. Numbers on curved lines represent the average junction-spanning read counts for each group, normalized using RPKM. The genomic localization of splicing events is displayed below the plots, showing exon-intron structures and splice junctions for each gene. The sashimi plot does not appear to exhibit dramatic changes in junction-spanning read counts or splicing patterns between *SF3B1*-mutant and WT samples, unlike *UBA7*, where such differences were more evident. (C) Boxplots illustrating the log2- normalized expression levels of *U2AF1* between WT (blue) and *SF3B1*-mutant (red) samples. *U2AF1* shows no significantly deregulated expression levels (adjusted p-value > 0.05).

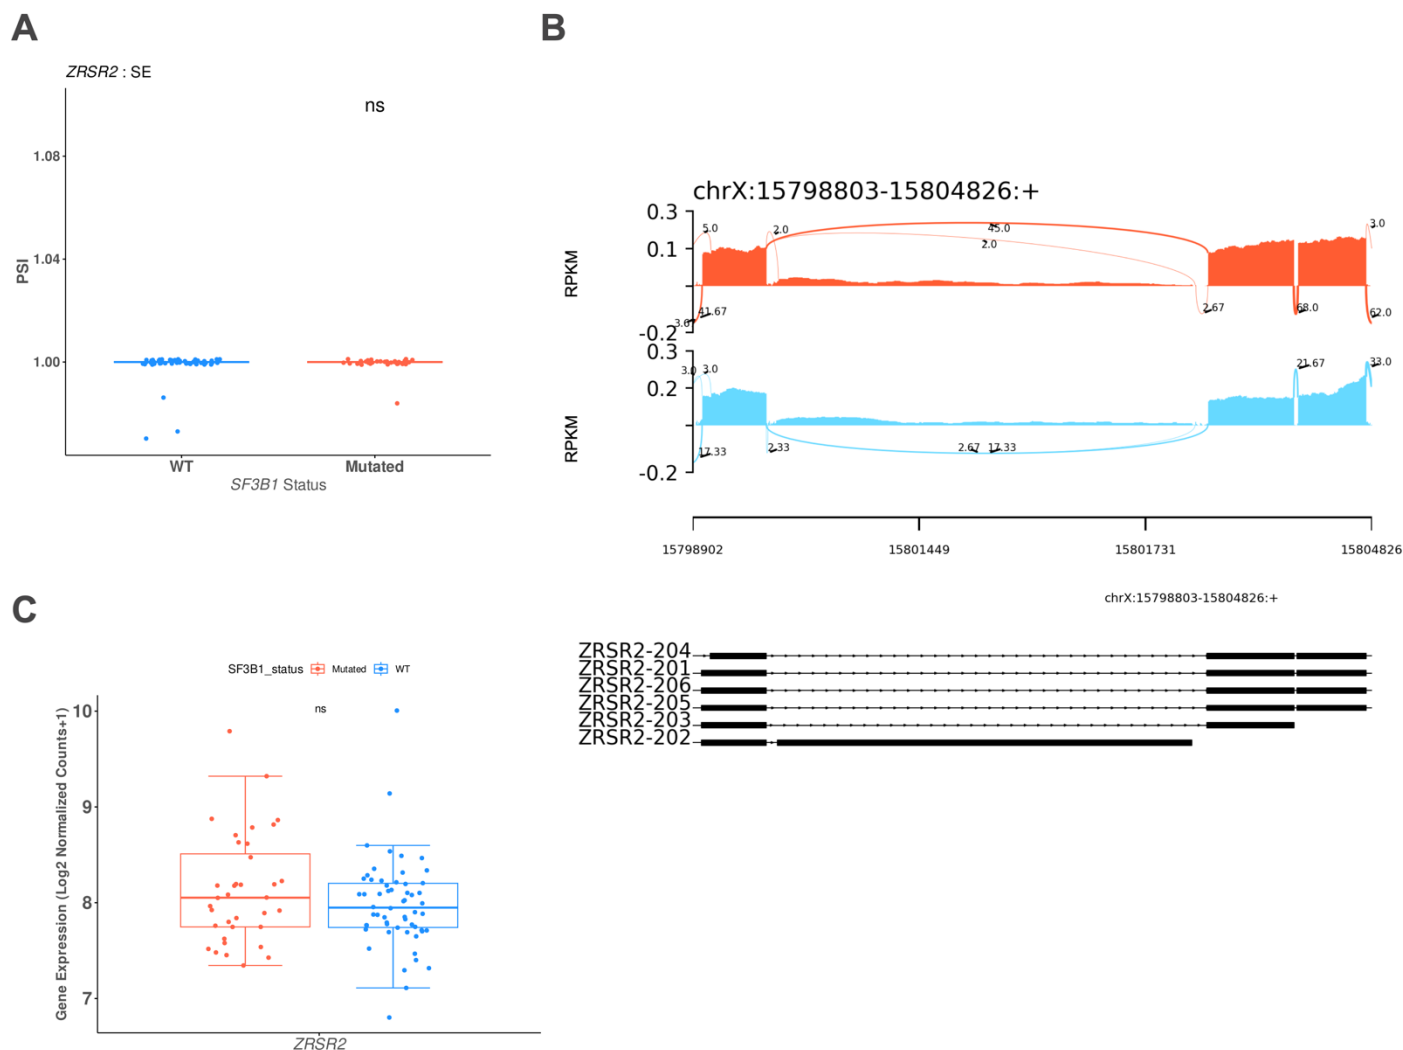

## Supplement 10: Evaluation of splicing and expression changes in the *ZRSR2* gene across *SF3B1*-mutant and wild-type samples

(A) Boxplot showing the PSI values for skipped exon (SE) events in *ZRSR2* between WT (blue) and *SF3B1*-mutant (red) samples. No significant difference (ns) is observed. (B) Sashimi plot comparing RNA-seq read coverage and splicing patterns for *ZRSR2* between WT (blue) and *SF3B1*-mutant (red) samples. The average junction-spanning read counts show no substantial differences between the groups. (F) Boxplot illustrating the log<sub>2</sub>- normalized expression levels of *ZRSR2* between WT (blue) and *SF3B1*-mutant (red) samples, showing no significant difference (ns).

**A**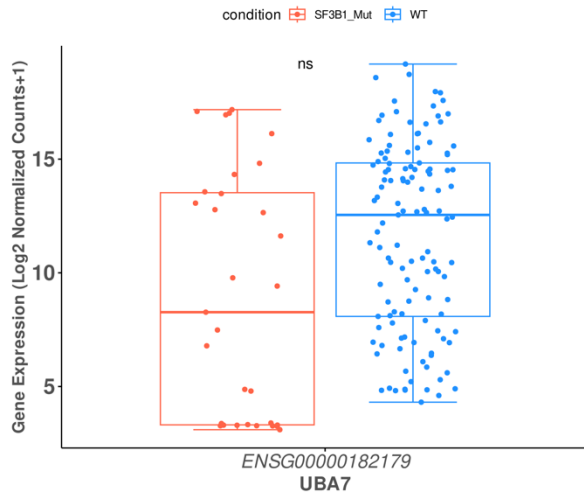**B**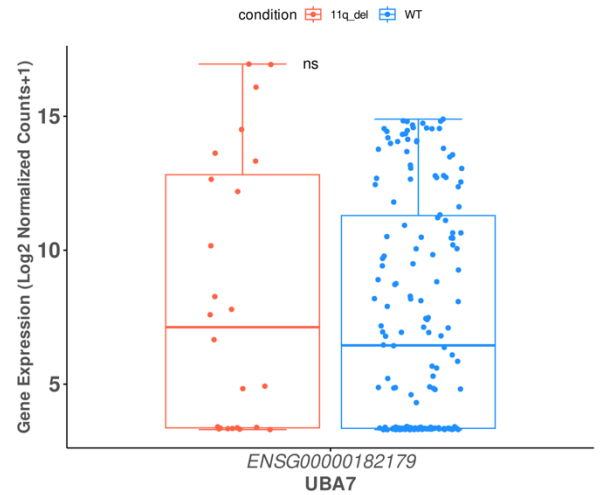

### Supplement 11: *UBA7* gene expression levels across *SF3B1* mutation and 11q deletion conditions in CLL

(A) Boxplot comparing *UBA7* gene expression (log2-normalized counts) between *SF3B1*-mutant (red) and wild-type (WT) (blue) samples in CLL. Although a pattern similar to that observed in MDS, where *UBA7* is downregulated in *SF3B1*-mutant samples, is seen here, the difference in gene expression is not statistically significant (ns). (B) Boxplot comparing *UBA7* gene expression (log2-normalized counts) between samples with 11q deletion (red) and WT (blue). Similarly, no significant difference (ns) is observed, suggesting that *UBA7* expression is not substantially affected by the 11q deletion condition.

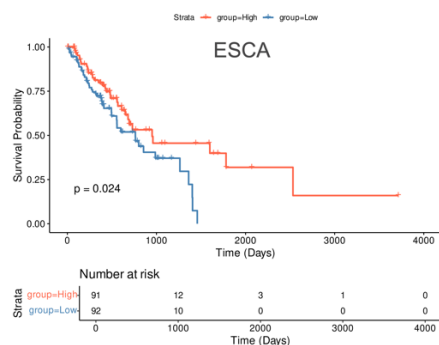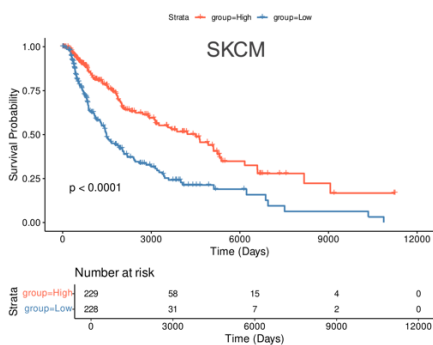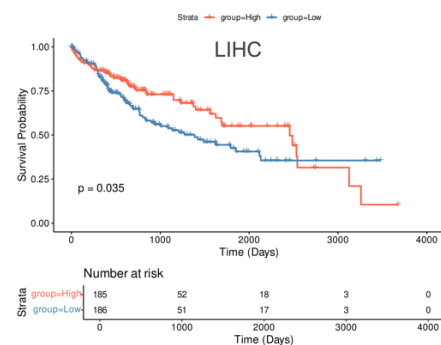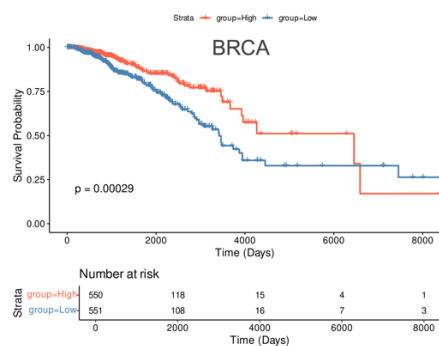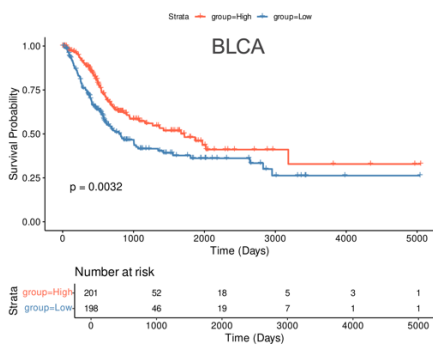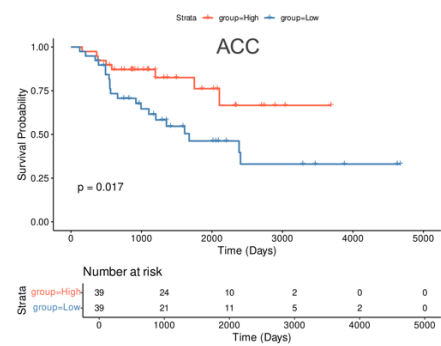

## Supplement 12: *UBA7* low gene expression is associated with poor overall survival in multiple cancer cohorts on the TCGA database.

Kaplan-Meier survival curves demonstrating the association between *UBA7* gene expression levels (high vs. low) and overall survival across six cancer types: ESCA (Esophageal Carcinoma), SKCM (Skin Cutaneous Melanoma), LIHC (Liver Hepatocellular Carcinoma), BRCA (Breast Cancer), BLCA (Bladder Cancer), and ACC (Adrenocortical Carcinoma). This figure highlights the prognostic value of *UBA7* gene expression levels across diverse cancer types and supports their potential use as biomarkers for patient stratification.
